# Supplementary material
Source: PubMed Central journal article supplement (PMC4152821)
Supplement: CJN.12691213_CJN12691213SupplementaryData.pdf [file CJN.12691213_CJN12691213SupplementaryData.pdf]

## Supplemental material

Table 1. Logistic regression model for propensity score for PRE-EMPTIVE RRT among patients with PRE-EMPTIVE RRT (n=105) and without RRT (n=2450).

|                                                                                    | Odds ratio (95% confidence interval) | P-value |
|------------------------------------------------------------------------------------|--------------------------------------|---------|
| Male sex                                                                           | 0.99 (0.60-1.62)                     | 0.96    |
| Chronic kidney disease <sup>a</sup>                                                | 1.86 (0.88-3.95)                     | 0.11    |
| APACHE II main diagnosis group                                                     | -                                    | 0.23    |
| Source of admission                                                                | -                                    | 0.02    |
| Received diuretics prior to ICU admission <sup>b</sup>                             | 1.42 (0.87-2.32)                     | 0.16    |
| Presence of severe sepsis at ICU admission                                         | 1.20 (0.70-2.06)                     | 0.51    |
| Cumulative urine output within first 24h (mL)                                      | 1.00 (1.00-1.00)                     | <0.001  |
| Highest AKI stage prior to RRT or for non-RRT patients within 24h of ICU admission | 3.46 (2.76-4.33)                     | <0.001  |
| First lactate in ICU (mmol/L) <sup>c</sup>                                         | 1.03 (0.96-1.10)                     | 0.44    |
| Highest dose of norepinephrine within first 24h (six categories) <sup>d</sup>      | 1.36 (1.14-1.63)                     | <0.001  |

The model included 2546 (99.6%) of 2555 patients.

Hosmer-Lemeshow test 10.236, P=0.249.

AUC for predicting EARLY RRT was 0.92 (95% CI 0.89-0.95).

<sup>a</sup> Glomerular filtration rate prior to critical illness below 60ml/min/1.73m<sup>2</sup> (patients with chronic need for dialysis were excluded from the study). Patients with missing data (n=9, 0.4%) were assumed not to have CKD.

<sup>b</sup> Patients with missing data (n=69, 2.7% ) were assumed not to have received diuretics.

<sup>c</sup> In 157 (6.1%) no lactate value measured in ICU was available, and the highest value measured prior to ICU admission was used. In 259 (10.1%) the value was missing and was imputed with the median of measured values.

<sup>d</sup> Dose categories: 1) none 2) <0.1 ug/kg/min 3) 0.1-0.2 ug/kg/min 4) 0.2-0.5ug/kg/min 5) 0.5-1.0 ug/kg/min 6) >1.0 ug/kg/min

Table 2. Indications for renal replacement therapy defined by the attending intensivists.

|                              | PRE-EMPTIVE   | CLASSIC        | P      | CLASSIC-URGENT | CLASSIC-DELAYED | P      |
|------------------------------|---------------|----------------|--------|----------------|-----------------|--------|
| Median number of indications | 2 [2-3]       | 3 [2-4]        | <0.001 | 3 [3-4]        | 3 [2-4]         | 0.57   |
| Hyperkalemia                 | 8/99 (8.1)    | 49/124 (39.5)  | <0.001 | 40/82 (48.8)   | 9/42 (21.4)     | 0.004  |
| Acidosis                     | 51/101 (50.5) | 100/129 (77.5) | <0.001 | 74/85 (87.1)   | 26/44 (59.1)    | 0.001  |
| High creatinine              | 68/103 (66.0) | 97/126 (77.0)  | 0.07   | 68/83 (81.9)   | 29/43 (67.4)    | 0.08   |
| Fluid overload               | 47/100 (47.0) | 50/124 (40.3)  | 0.34   | 20/82 (24.4)   | 30/42 (71.4)    | <0.001 |
| Oliguria                     | 80/105 (76.2) | 111/128 (86.7) | 0.04   | 71/87 (81.6)   | 40/41 (97.6)    | 0.01   |
| Rhabdomyolysis               | 20/97 (20.6)  | 8/114 (7.0)    | 0.004  | 5/75 (6.7)     | 3/39 (7.7)      | 1.0    |
| Else                         | 4/97 (4.1)    | 6/116 (5.2)    | 0.76   | 6/75 (8.0)     | 0/41 (0.0)      | 0.09   |

Data expressed as median [interquartile range] or number/total number (percentage).

Table 3. Matched patients with PRE-EMPTIVE RRT compared to those with PRE-EMPTIVE RRT left without a match.

|                                          | Matched PRE-EMPTIVE<br>RRT n=67 | Non-matched PRE-EMPTIVE<br>RRT n=38 | <i>P</i>         |
|------------------------------------------|---------------------------------|-------------------------------------|------------------|
| Age                                      | 64.0 [56.0-76.0]                | 60.5 [40.0-70.3]                    | 0.07             |
| Male sex                                 | 44/67 (65.7)                    | 25/38 (65.8)                        | 1.0              |
| Chronic kidney disease                   | 10/66 (15.2)                    | 3/38 (7.9)                          | 0.37             |
| Number of pre-existing chronic illnesses | 1 [0-2]                         | 1 [0-2]                             | 0.21             |
| Operative admission                      | 33/67 (49.3)                    | 19/38 (50.0)                        | 1.0              |
| Emergency admission                      | 56/67 (83.6)                    | 34/38 (89.5)                        | 0.56             |
| <i>Admitted from</i>                     |                                 |                                     | <i>0.16</i>      |
| Operating room or recovery room          | 32/67 (47.8)                    | 20/38 (52.6)                        |                  |
| Emergency room                           | 14/67 (20.9)                    | 12/38 (31.6)                        |                  |
| Ward                                     | 15/67 (22.4)                    | 6/38 (15.8)                         |                  |
| Other                                    | 6/67 (9.0)                      | 0/38 (0.0)                          |                  |
| SAPS II score                            | 45.0 [35.0-59.0]                | 50.0 [37.5-64.3]                    | 0.27             |
| SAPS II score without age points         | 35.0 [25.0-46.0]                | 39.5 [31.8-51.3]                    | 0.06             |
| SOFA score, first 24h                    | 10.0 [8.0-13.0]                 | 12.0 [8.0-13.3]                     | 0.16             |
| SOFA score, maximum                      | 12.0 [9.0-14.0]                 | 13.0 [10.0-15.3]                    | 0.19             |
| Mechanical ventilation (ICU stay)        | 58/67 (86.6)                    | 33/38 (86.8)                        | 1.0              |
| Vasoactive drugs (ICU stay)              | 60/67 (89.6)                    | 32/38 (84.2)                        | 0.54             |
| Severe sepsis until day 5                | 31/67 (46.3)                    | 17/38 (44.7)                        | 1.0              |
| AKI prior to RRT                         | 55/67 (82.1)                    | 37/37 (100.0)                       | 0.01             |
| <i>Highest AKI stage prior to RRT</i>    |                                 |                                     | <i>&lt;0.001</i> |

|                                            |                   |                    |       |
|--------------------------------------------|-------------------|--------------------|-------|
| -stage 1                                   | 15/55 (27.3)      | 4/37 (10.8)        |       |
| -stage 2                                   | 21/55 (38.2)      | 8/37 (21.6)        |       |
| -stage 3                                   | 19/55 (34.5)      | 25/37 (67.6)       |       |
| Time from hospital admission to RRT (days) | 3.0 [1.0-5.0]     | 1.0 [1.0-2.3]      | 0.001 |
| Time from ICU admission to RRT (hours)     | 25.2 [11.0-47.3]  | 21.3 [6.6-42.2]    | 0.39  |
| CRRT as initial modality                   | 50/67 (74.6)      | 30/38 (78.9)       | 0.81  |
| <b>At RRT initiation</b>                   |                   |                    |       |
| K (mEq/L)                                  | 4.1 [3.9-4.6]     | 4.6 [4.2-5.0]      | 0.01  |
| pH                                         | 7.35 [7.28-7.41]  | 7.34 [7.27-7.39]   | 0.54  |
| BE (mmol/L)                                | -5.1 [-9.3- -2.3] | -7.3 [-10.3- -3.9] | 0.17  |
| Lactate (mmol/L)                           | 1.9 [1.1-3.5]     | 1.8 [1.3-4.2]      | 0.52  |
| Creatinine prior to RRT (mg/dL)            | 2.4 [1.5-3.3]     | 3.1 [2.6-4.9]      | 0.01  |
| Urea (mmol/L)                              | 16.8 [10.9-25.3]  | 22.2 [14.4-26.1]   | 0.05  |
| Urine output mL/24h <sup>b</sup>           | 460 [111-1332]    | 275 [99-516]       | 0.08  |
| Fluid accumulation %                       | 4.9 [0.3-10.6]    | 5.2 [1.9-11.0]     | 0.45  |
| Diuretics prior to RRT                     | 53/67 (79.1)      | 26/38 (68.4)       | 0.25  |

Data expressed as median [interquartile range] or number/total number (percentage).

<sup>a</sup> Comparison across groups

<sup>b</sup> on the day of RRT initiation

AKI; acute kidney injury, CRRT; continuous renal replacement therapy, ICU; intensive care unit, RRT; renal replacement therapy, SAPS; Simplified Acute Physiology Score, SOFA; Sequential Organ Failure Assessment
